# Supplementary material for: The kinesin-8 Kip3 scales anaphase spindle length by suppression of midzone microtubule polymerization
Source: PubMed Central journal article supplement — J Cell Biol. 2014 Mar 17;204(6):965–75. doi: 10.1083/jcb.201312039 (PMC3998799; doi:10.1083/jcb.201312039), 2014-03-17
Supplement: supp_jcb.201312039_JCB_201312039_sm.pdf [file supp_jcb.201312039_JCB_201312039_sm.pdf]

Rizk et al., <http://www.jcb.org/cgi/content/full/jcb.201312039/DC1>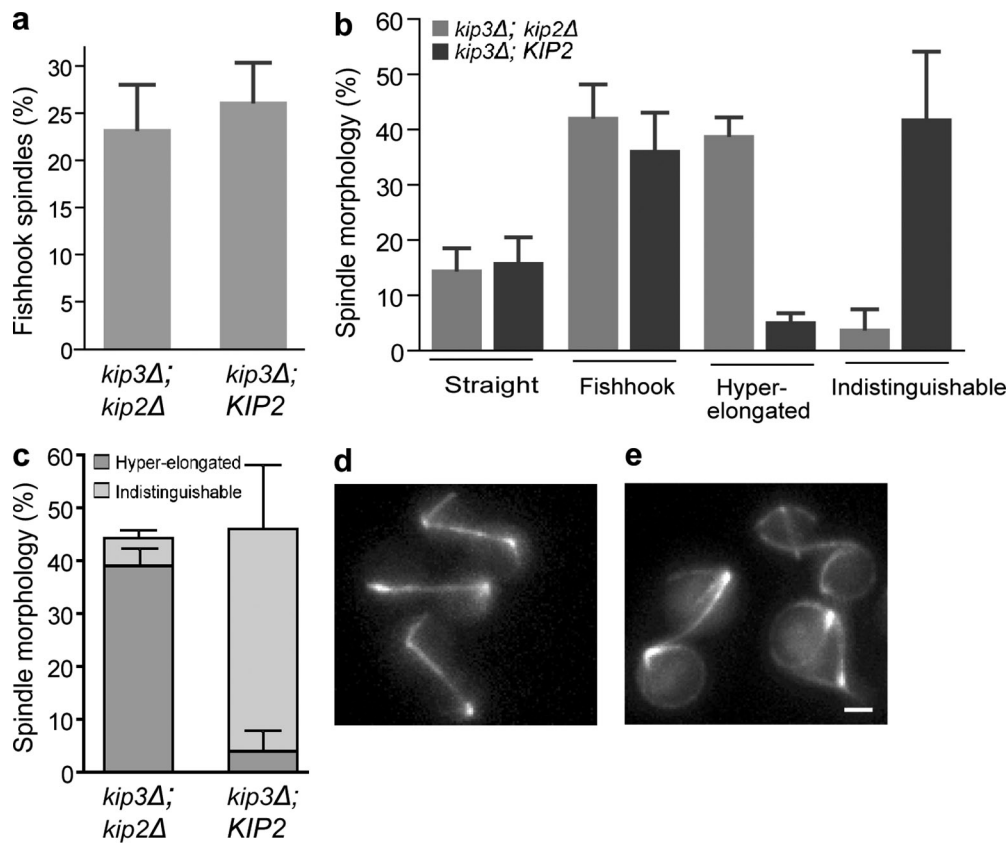

**Figure S1. Kip3 limits anaphase spindle length regardless of genetic background.** (a) The proportion of fishhook spindles in cycling cultures lacking Kip3, either with or without Kip2, was essentially unchanged. The graph shows the average  $\pm$  SE of three experiments,  $n = 69$  for each cell type. (b) Spindle fishhook and hyper-elongation frequencies during anaphase arrest (*cdc15-2*, 2.5 h at 37°C) in *kip3Δ* cells in the presence or absence of Kip2. The frequency of fishhook spindles was similar regardless of whether cells possessed Kip2. The indistinguishable category represents likely hyper-elongated spindles, where spindle length could not be precisely measured due to interference from astral microtubules. The graph shows the average  $\pm$  SE of three experiments,  $n > 300$  for each cell type. (c) Although astral microtubules interfered with accurate length measurements, the total number of hyper-elongated and non-measurable spindles in panel b was also comparable. Thus, removal of Kip2 did not significantly affect spindle length regulation or morphology. (d and e) To ensure that the role of Kip3 in spindle length regulation is not specific to genetic strain or background, we confirmed the result with independently created strains (S288C) as well as a different genetic background (W303). Representative spindle morphology in W303 cells after 2.5 h anaphase arrest with (d) or without (e) Kip3. Bar, 2  $\mu$ m.

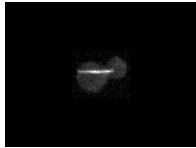

Video 1. **Midzone microtubule dynamics of an elongating anaphase spindle in a control cell.** The video shows fluorescence recovery in a budding yeast spindle midzone after photobleaching GFP-tubulin in a *cdc15-2* cell maintained at 37°C. Pre-bleach and post-bleach frames were extended to allow clear observation. Arrow indicates location of bleached zone. Images were acquired at 5-s intervals using an EM-CCD camera (Cascade 512B; Photometrics) and a spinning-disk confocal attachment (CSU10; Yokogawa Corporation of America) mounted on a microscope (Axiovert 200M; Carl Zeiss). The microscope and photobleaching laser (MicroPoint; Photonics Instruments, Inc.) were controlled by MetaMorph software (Molecular Devices). Playback speed is 15 frames/s.

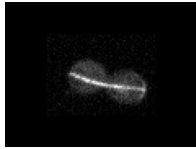

Video 2. **Midzone microtubule dynamics of a full-length anaphase spindle in a control cell.** The video shows fluorescence recovery in a budding yeast spindle midzone after photobleaching GFP-tubulin in a *cdc15-2* cell maintained at 37°C. Pre-bleach and post-bleach frames were extended to allow clear observation. Arrow indicates location of bleached zone. Images were acquired at 5-s intervals using an EM-CCD camera (Cascade 512B; Photometrics) and a spinning-disk confocal attachment (CSU10; Yokogawa Corporation of America) mounted on a microscope (Axiovert 200M; Carl Zeiss). The microscope and photobleaching laser (MicroPoint; Photonics Instruments, Inc.) were controlled by MetaMorph software (Molecular Devices). Playback speed is 15 frames/s.

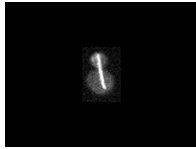

Video 3. **Midzone microtubule dynamics of an elongating anaphase spindle in a *kip3Δ* cell.** The video shows fluorescence recovery in a budding yeast spindle midzone after photobleaching GFP-tubulin in a *kip3Δ cdc15-2* cell maintained at 37°C. Pre-bleach and post-bleach frames were extended to allow clear observation. Arrow indicates location of bleached zone. Images were acquired at 5-s intervals using an EM-CCD camera (Cascade 512B; Photometrics) and a spinning-disk confocal attachment (CSU10; Yokogawa Corporation of America) mounted on a microscope (Axiovert 200M; Carl Zeiss). The microscope and photobleaching laser (MicroPoint; Photonics Instruments, Inc.) were controlled by MetaMorph software (Molecular Devices). Playback speed is 15 frames/s.

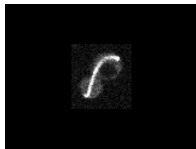

Video 4. **Midzone microtubule dynamics of a full-length anaphase spindle in a *kip3Δ* cell.** The video shows fluorescence recovery in a budding yeast spindle midzone after photobleaching GFP-tubulin in a *kip3Δ cdc15-2* cell maintained at 37°C. Pre-bleach and post-bleach frames were extended to allow clear observation. Arrow indicates location of bleached zone. Images were acquired at 5-s intervals using an EM-CCD camera (Cascade 512B; Photometrics) and a spinning-disk confocal attachment (CSU10; Yokogawa Corporation of America) mounted on a microscope (Axiovert 200M; Carl Zeiss). The microscope and photobleaching laser (MicroPoint; Photonics Instruments, Inc.) were controlled by MetaMorph software (Molecular Devices). Playback speed is 15 frames/s.

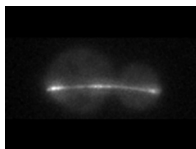

Video 5. **Microtubule plus-end dynamics in a full-length anaphase spindle in a control cell.** The video shows budding yeast spindle microtubules imaged by GFP-tubulin fluorescence in a *cdc15-2* cell maintained at 37°C. Z-plane images spaced 0.4 μm apart, and encompassing the cell, were acquired at 10-s intervals using a CoolSNAP HQ<sup>2</sup> CCD camera (Photometrics) mounted on a microscope (AxioImager M2; Carl Zeiss) driven by SlideBook software (Intelligent Imaging Innovations, Inc.). Maximum intensity Z-projections of each time point are played at 10 frames/s.

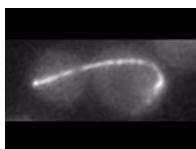

Video 6. **Microtubule plus-end dynamics in a full-length anaphase spindle in a *kip3Δ* cell.** The video shows budding yeast spindle microtubules imaged by GFP-tubulin fluorescence in a *kip3Δ cdc15-2* cell maintained at 37°C. Z-plane images spaced 0.4 μm apart, and encompassing the cell, were acquired at 10-s intervals using a CoolSNAP HQ<sup>2</sup> CCD camera (Photometrics) mounted on a microscope (AxioImager M2; Carl Zeiss) driven by SlideBook software (Intelligent Imaging Innovations, Inc.). Maximum intensity Z-projections of each time point are played at 10 frames/s.

Table S1. Yeast strains and plasmids used in this study

| Strain name         | Mating type  | Relevant genotype                                                                                                                                                              | Genetic background | Source                         |
|---------------------|--------------|--------------------------------------------------------------------------------------------------------------------------------------------------------------------------------|--------------------|--------------------------------|
| MGY960              | MAT $\alpha$ | <i>ura3-52::GFP-TUB1-URA3 cdc15-2 his3<math>\Delta</math>200 leu2<math>\Delta</math>1 trp1<math>\Delta</math>63</i>                                                            | S288C              | This study                     |
| MGY962              | MAT $\alpha$ | <i>ura3-52::GFP-TUB1-URA3 cdc15-2 kip3<math>\Delta</math>::KanR his3<math>\Delta</math>200 leu2<math>\Delta</math>1 trp1<math>\Delta</math>63</i>                              | S288C              | This study                     |
| MGY963              | MAT $\alpha$ | <i>ura3-52::GFP-TUB1-URA3 cdc15-2 kip2<math>\Delta</math>::NAT his3<math>\Delta</math>200 leu2<math>\Delta</math>1 trp1<math>\Delta</math>63</i>                               | S288C              | This study                     |
| MGY965              | MAT $\alpha$ | <i>ura3-52::GFP-TUB1-URA3 cdc15-2 kip2<math>\Delta</math>::NAT kip3<math>\Delta</math>::KanR his3<math>\Delta</math>200 leu2<math>\Delta</math>1 trp1<math>\Delta</math>63</i> | S288C              | This study                     |
| MGY964              | MAT $\alpha$ | <i>ura3-52::GFP-TUB1-URA3 cdc15-2 kip2<math>\Delta</math>::NAT his3<math>\Delta</math>200 leu2<math>\Delta</math>1 trp1<math>\Delta</math>63</i>                               | S288C              | This study                     |
| MGY966              | MAT $\alpha$ | <i>ura3-52::GFP-TUB1-URA3 cdc15-2 kip2<math>\Delta</math>::NAT kip3<math>\Delta</math>::KanR his3<math>\Delta</math>200 leu2<math>\Delta</math>1 trp1<math>\Delta</math>63</i> | S288C              | This study                     |
| MGY959              | MAT $\alpha$ | <i>ura3-52::GFP-TUB1-URA3 cdc15-2 his3<math>\Delta</math>200 leu2<math>\Delta</math>1 trp1<math>\Delta</math>63</i>                                                            | S288C              | This study                     |
| MGY961              | MAT $\alpha$ | <i>ura3-52::GFP-TUB1-URA3 cdc15-2 kip3<math>\Delta</math>::KanR his3<math>\Delta</math>200 leu2<math>\Delta</math>1 trp1<math>\Delta</math>63</i>                              | S288C              | This study                     |
| MGY974              | MAT $\alpha$ | <i>ura3-52::GFP-TUB1-URA3 cdc15-2 ip11-321-NAT leu2<math>\Delta</math>0 lys2<math>\Delta</math>0</i>                                                                           | S288C              | This study                     |
| MGY515              | MAT $\alpha$ | <i>ura3::GFP-TUB1-URA3 cdc15-2 his3 leu2 trp1</i>                                                                                                                              | W303               | This study                     |
| MGY679              | MAT $\alpha$ | <i>ura3::GFP-TUB1-URA3 cdc15-2 kip3<math>\Delta</math>::KanR his3 leu2 trp1</i>                                                                                                | W303               | This study                     |
| MGY1282             | MAT $\alpha$ | <i>ura3-52::GFP-TUB1-URA3 cdc15-2 stu2-13-URA3 kip2<math>\Delta</math>::NAT kip3<math>\Delta</math>::KanR leu2<math>\Delta</math>1 his3-200 lys2-801</i>                       | S288C              | This study                     |
| MGY361              | MAT $\alpha$ | <i>pHIS-ceCFP-Tub1-URA3 cdc15-2 his3<math>\Delta</math>200 leu2<math>\Delta</math>1 trp1<math>\Delta</math>63</i>                                                              | S288C              | This study                     |
| MGY1528             | MAT $\alpha$ | <i>ura3-52::GFP-TUB1-URA3 Ctf3<math>\Delta</math>::KanR cdc15-2-NATmx his3<math>\Delta</math>1 leu2<math>\Delta</math>0 met15<math>\Delta</math>0</i>                          | S288C              | This study                     |
| MGY1529             | MAT $\alpha$ | <i>ura3-52::GFP-TUB1-URA3 mcm21<math>\Delta</math>::KanR cdc15-2-NATmx his3<math>\Delta</math>1 leu2<math>\Delta</math>0 met15<math>\Delta</math>0</i>                         | S288C              | This study                     |
| MGY1530             | MAT $\alpha$ | <i>ura3-52::GFP-TUB1-URA3 eaf3<math>\Delta</math>::KanR cdc15-2-NATmx his3<math>\Delta</math>1 leu2<math>\Delta</math>0 met15<math>\Delta</math>0</i>                          | S288C              | This study                     |
| MGY1531             | MAT $\alpha$ | <i>ura3-52::GFP-TUB1-URA3 mcm1<math>\Delta</math>::KanR cdc15-2-NATmx his3<math>\Delta</math>1 leu2<math>\Delta</math>0 met15<math>\Delta</math>0</i>                          | S288C              | This study                     |
| MGY1532             | MAT $\alpha$ | <i>ura3-52::GFP-TUB1-URA3 dip5<math>\Delta</math>::KanR cdc15-2-NATmx his3<math>\Delta</math>1 leu2<math>\Delta</math>0 met15<math>\Delta</math>0</i>                          | S288C              | This study                     |
| MGY1533             | MAT $\alpha$ | <i>ura3-52::GFP-TUB1-URA3 dbf2<math>\Delta</math>::KanR cdc15-2-NATmx his3<math>\Delta</math>1 leu2<math>\Delta</math>0 met15<math>\Delta</math>0</i>                          | S288C              | This study                     |
| MGY1534             | MAT $\alpha$ | <i>ura3-52::GFP-TUB1-URA3 ylr456w<math>\Delta</math>::KanR cdc15-2-NATmx his3<math>\Delta</math>1 leu2<math>\Delta</math>0 met15<math>\Delta</math>0</i>                       | S288C              | This study                     |
| MGY1535             | MAT $\alpha$ | <i>ura3-52::GFP-TUB1-URA3 hcm1<math>\Delta</math>::KanR cdc15-2 LEU2 trp1<math>\Delta</math>63 met15<math>\Delta</math>0</i>                                                   | S288C              | This study                     |
| MGY1536             | MAT $\alpha$ | <i>ura3-52::GFP-TUB1-URA3 chl4<math>\Delta</math>::KanR cdc15-2 MET15 LEU2 trp1<math>\Delta</math>63</i>                                                                       | S288C              | This study                     |
| MGY1537             | MAT $\alpha$ | <i>ura3-52::GFP-TUB1-URA3 eaf6<math>\Delta</math> cdc15-2 MET15 LEU2 TRP1</i>                                                                                                  | S288C              | This study                     |
| MGY1538             | MAT $\alpha$ | <i>pHIS-ceCFP-Tub1-URA3 cdc15-2 ASE1-3xYFP-LEU2 kip2<math>\Delta</math>::NAT his3<math>\Delta</math>200 trp1<math>\Delta</math>63</i>                                          | S288C              | This study                     |
| MGY1539             | MAT $\alpha$ | <i>pHIS-ceCFP-Tub1-URA3 cdc15-2 ASE1-3xYFP-LEU2 kip3<math>\Delta</math>::KanR kip2<math>\Delta</math>::NAT his3<math>\Delta</math>200 trp1<math>\Delta</math>63</i>            | S288C              | This study                     |
| MGY1540             | MAT $\alpha$ | <i>pHIS-ceCFP-Tub1-URA3 cdc15-2 KIP3-EYFP::HIS kip2<math>\Delta</math>::NAT his3<math>\Delta</math>200 trp1<math>\Delta</math>63</i>                                           | S288C              | This study                     |
| MGY1464             | MAT $\alpha$ | <i>pHIS-ceCFP-Tub1-URA3 cdc15-2 KIP3-CC-EYFP::LEU2 kip2<math>\Delta</math>::NAT his3<math>\Delta</math>200 trp1<math>\Delta</math>63</i>                                       | S288C              | This study                     |
| <b>Plasmid name</b> |              | <b>Description and markers</b>                                                                                                                                                 |                    | <b>Source</b>                  |
| pAFS125             |              | GFP-TUB1-URA3, <i>ampR</i>                                                                                                                                                     |                    | (Straight et al., 1997)        |
| pMG3                |              | GFP-TUB1-LEU2, <i>ampR</i>                                                                                                                                                     |                    | (Gupta et al., 2002)           |
| pAG25               |              | <i>natMX4, ampR</i>                                                                                                                                                            |                    | (Goldstein and McCusker, 1999) |

## References

- Goldstein, A.L., and J.H. McCusker. 1999. Three new dominant drug resistance cassettes for gene disruption in *Saccharomyces cerevisiae*. *Yeast*. 15:1541–1553. [http://dx.doi.org/10.1002/\(SICI\)1097-0061\(199910\)15:14<1541::AID-YEA476>3.0.CO;2-K](http://dx.doi.org/10.1002/(SICI)1097-0061(199910)15:14<1541::AID-YEA476>3.0.CO;2-K)
- Gupta, M.L. Jr., C.J. Bode, D.A. Thrower, C.G. Pearson, K.A. Suprenant, K.S. Bloom, and R.H. Himes. 2002. beta-Tubulin C354 mutations that severely decrease microtubule dynamics do not prevent nuclear migration in yeast. *Mol. Biol. Cell*. 13:2919–2932. <http://dx.doi.org/10.1091/mbc.E02-01-0003>
- Straight, A.F., W.F. Marshall, J.W. Sedat, and A.W. Murray. 1997. Mitosis in living budding yeast: anaphase A but no metaphase plate. *Science*. 277:574–578. <http://dx.doi.org/10.1126/science.277.5325.574>
